# Supplementary material for: Preparation of a broad-specific monoclonal antibody and development of an immunochromatographic assay for monitoring of anthranilic diamides in vegetables and fruits
Source: Royal Society of Chemistry journal article supplement (doi:10.1039/d2an01366e), 2022-01-01
Supplement: d2an01366e1.pdf [file d2an01366e1.pdf]

*Supplementary Information*

**Preparation of a broad-specific monoclonal antibody and  
development of an immunochromatographic assay for  
monitoring of anthranilic diamides in vegetables and fruits**

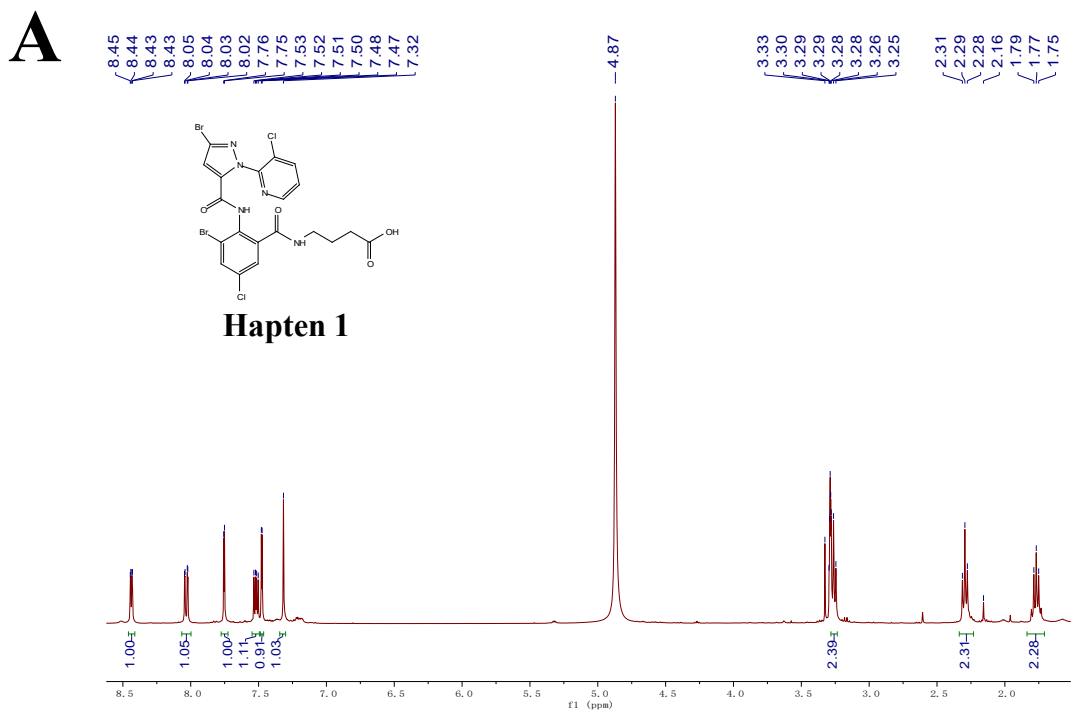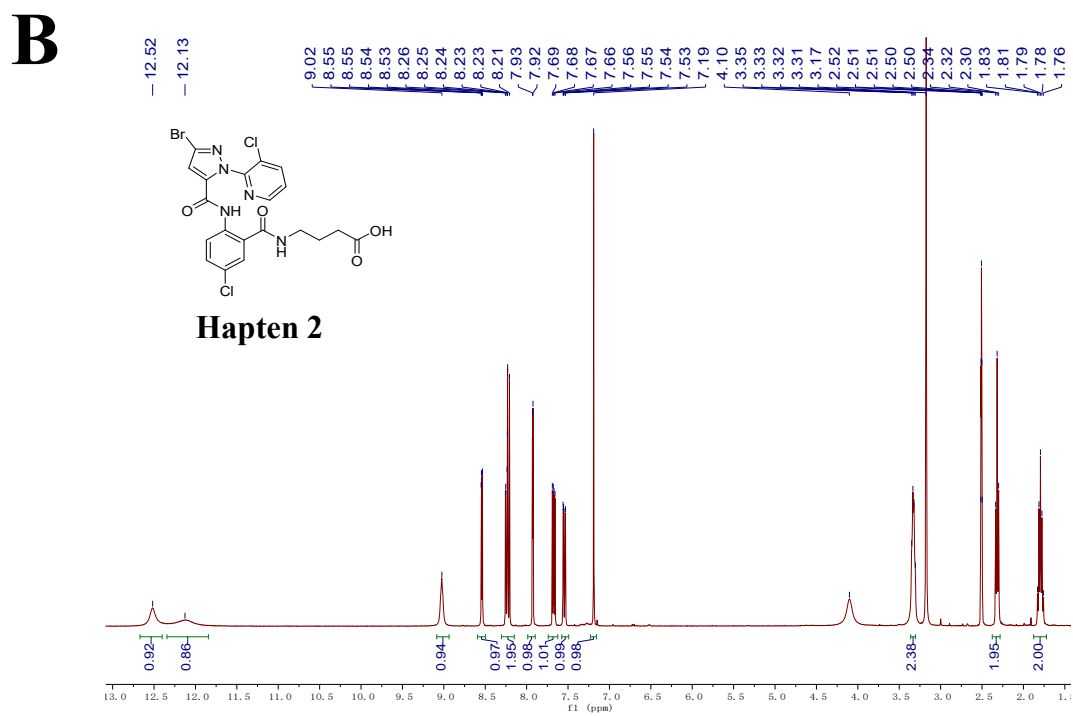

**Figure S1.**  $^1\text{H}$  NMR of the hapten 1 (A) and hapten 2 (B).
